# Supplementary material for: Cyanine/iodonium salt as a broad-absorbing photoinitiating system for radical photopolymerization under near-UV, visible and NIR light
Source: Royal Society of Chemistry journal article supplement (doi:10.1039/d2py01466a), 2023-01-01
Supplement: d2py01466a1.pdf [file d2py01466a1.pdf]

# Cyanine/iodonium salt as a broad-absorbing photoinitiating systems for radical photopolymerization under near-UV, visible and NIR lights

Xianglong He <sup>a</sup>, Yayu Shao <sup>a</sup>, Yulian Pang <sup>b</sup>, Jing Wang <sup>a</sup>, Mingke Liu <sup>c</sup>, Yangyang Xin <sup>b, \*</sup>, and

Yingquan Zou <sup>a, \*</sup>

<sup>a</sup> College of Chemistry, Beijing Normal University, Beijing, 100875, People's Republic of China

<sup>b</sup> Hubei Gurun Technology Co., Ltd, Jingmen, 448000, People's Republic of China

<sup>c</sup> Baoding Lucky Innovative Materials Co., Ltd, Baoding, 071000, People's Republic of China

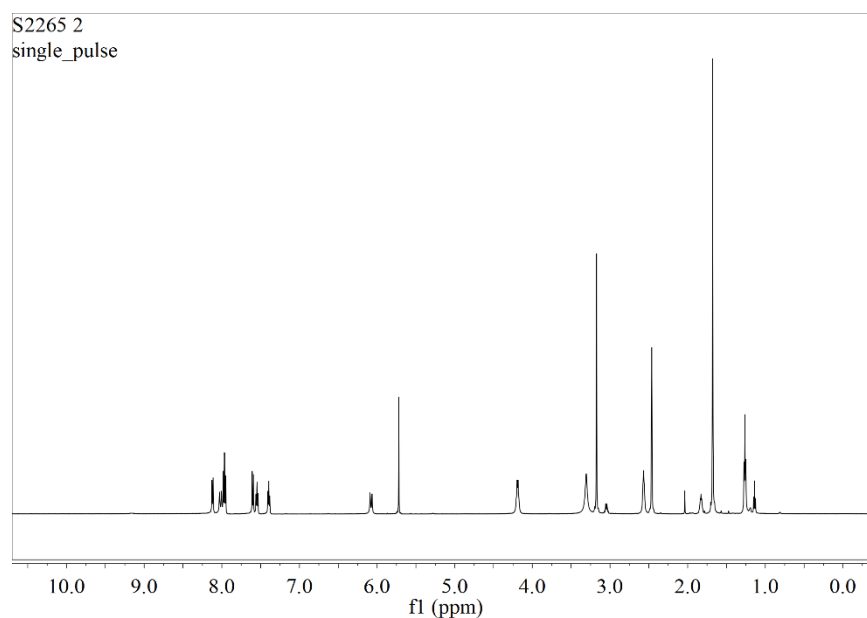

**Fig. S1** <sup>1</sup>H NMR spectrum of S2265.

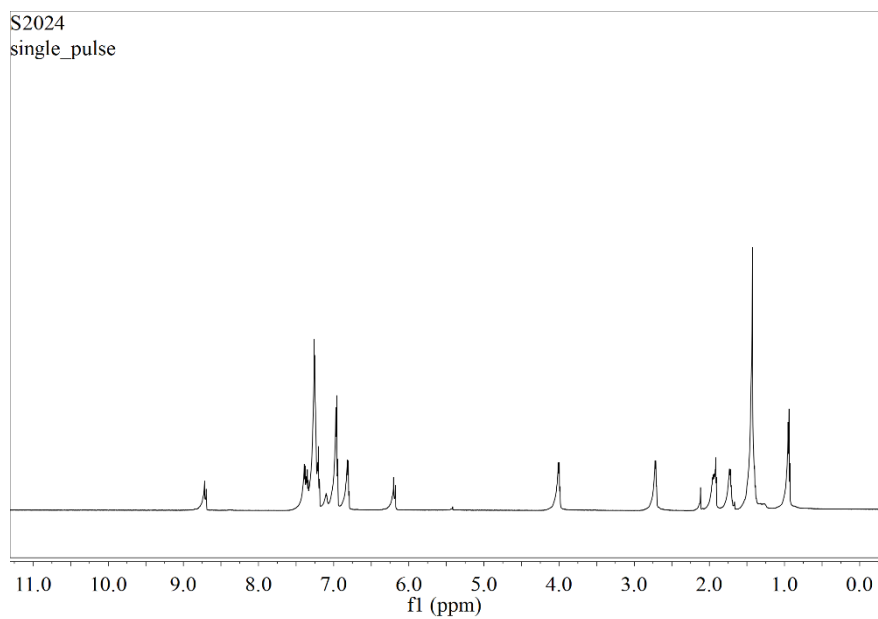

**Fig. S2**  $^1\text{H}$  NMR spectrum of S2024.

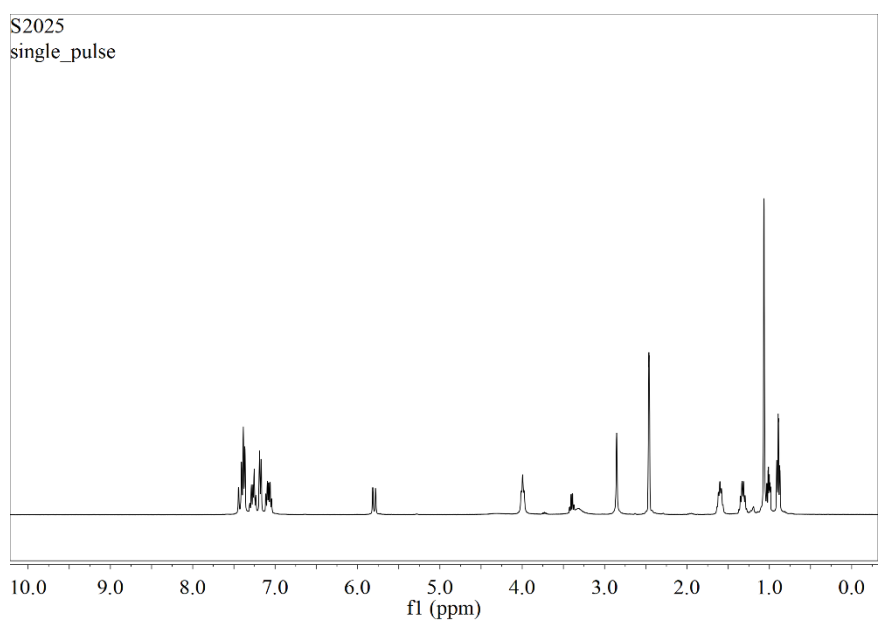

**Fig. S3**  $^1\text{H}$  NMR spectrum of S2025.

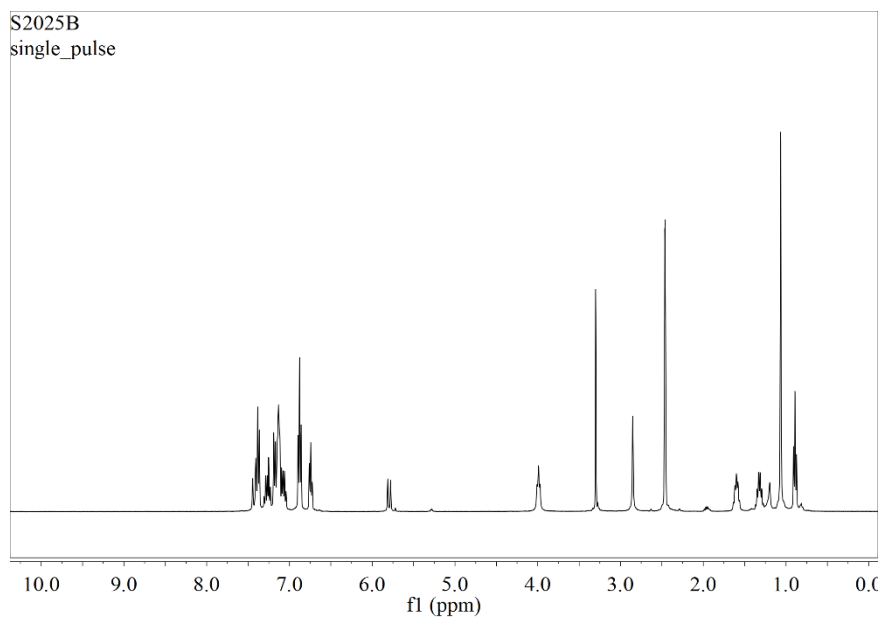

Fig. S4 <sup>1</sup>H NMR spectrum of S2025B.

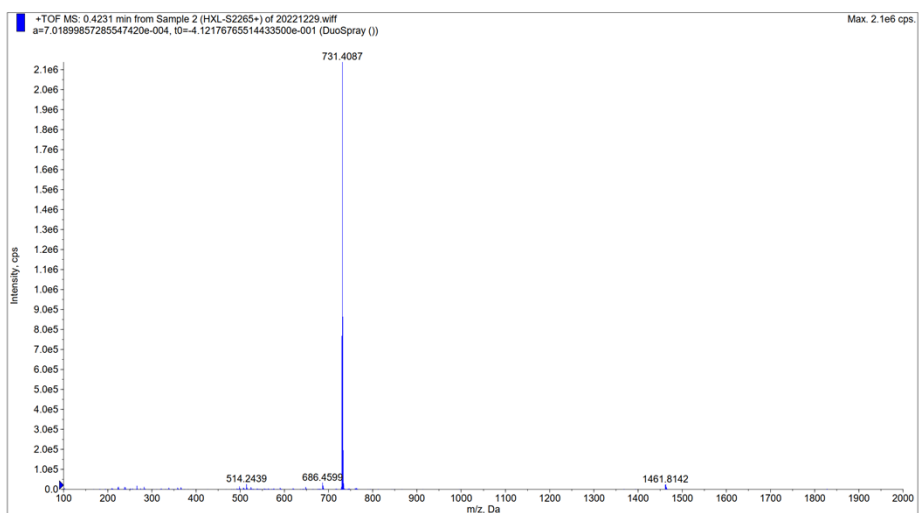

Fig. S5 High-resolution mass spectra (HRMS) of S2265.

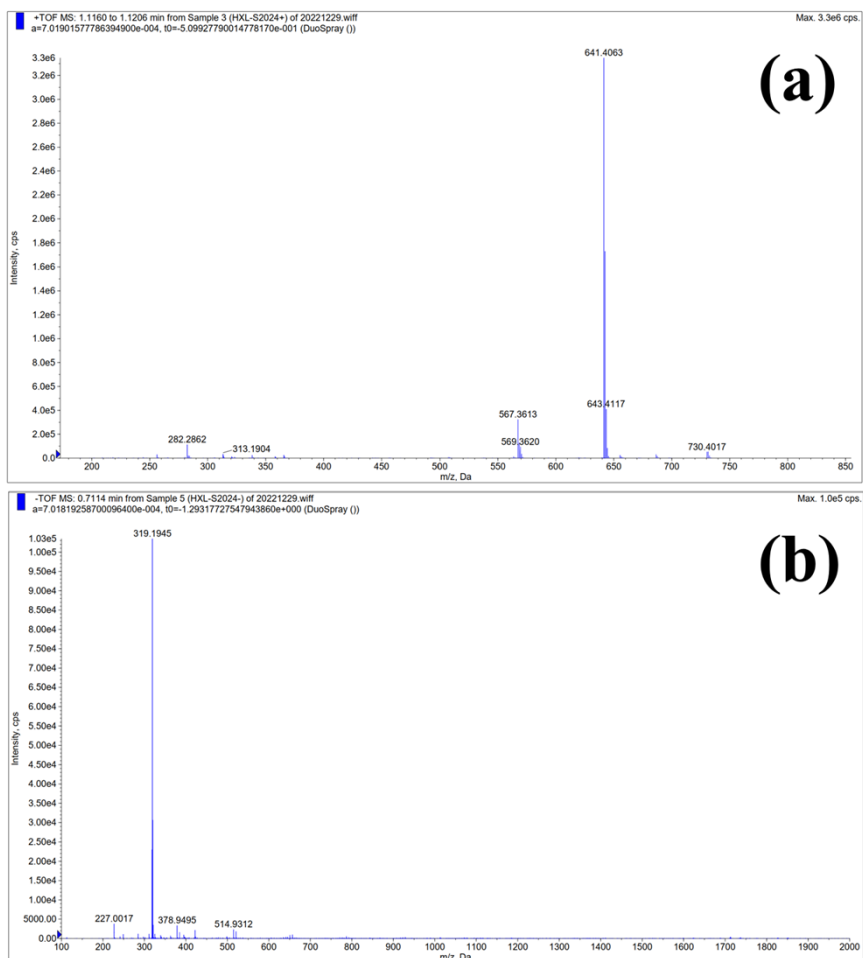

Fig. S6 High-resolution mass spectra (HRMS) of S2024,  $M^+$  for (a) and  $M^-$  for (b).

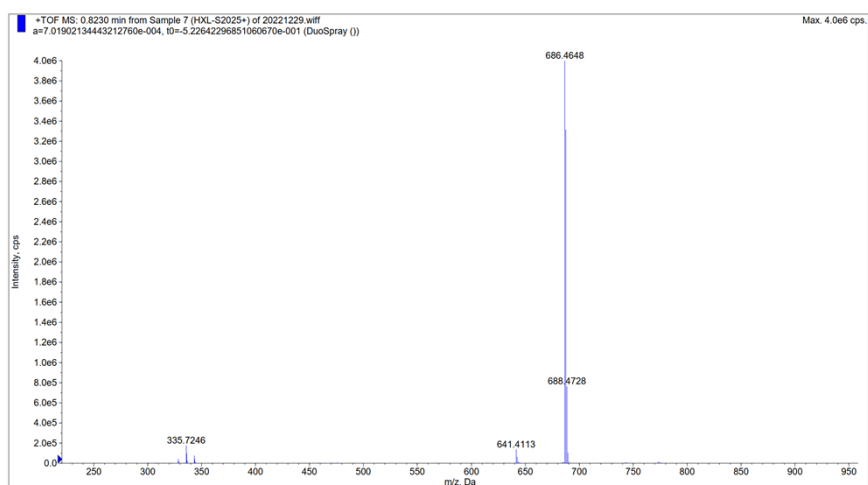

Fig. S7 High-resolution mass spectra (HRMS) of S2025 ( $M^+$ ).

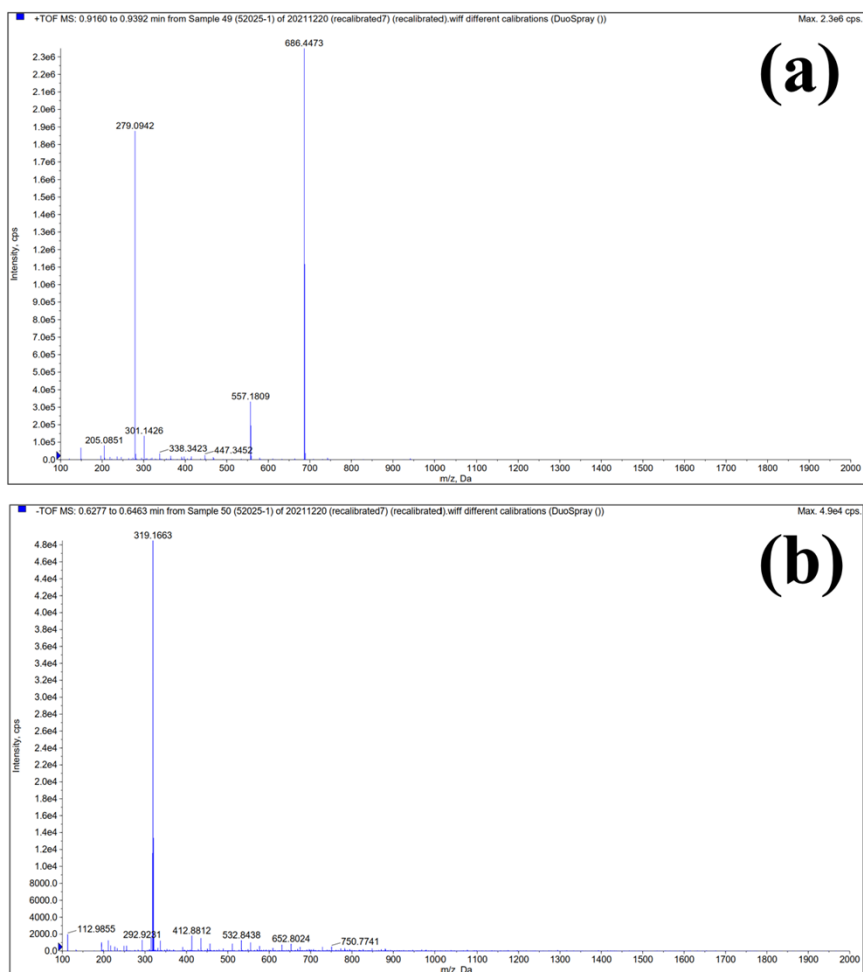

**Fig. S8** High-resolution mass spectra (HRMS) of S2025B,  $M^+$  for (a) and  $M^-$  for (b).

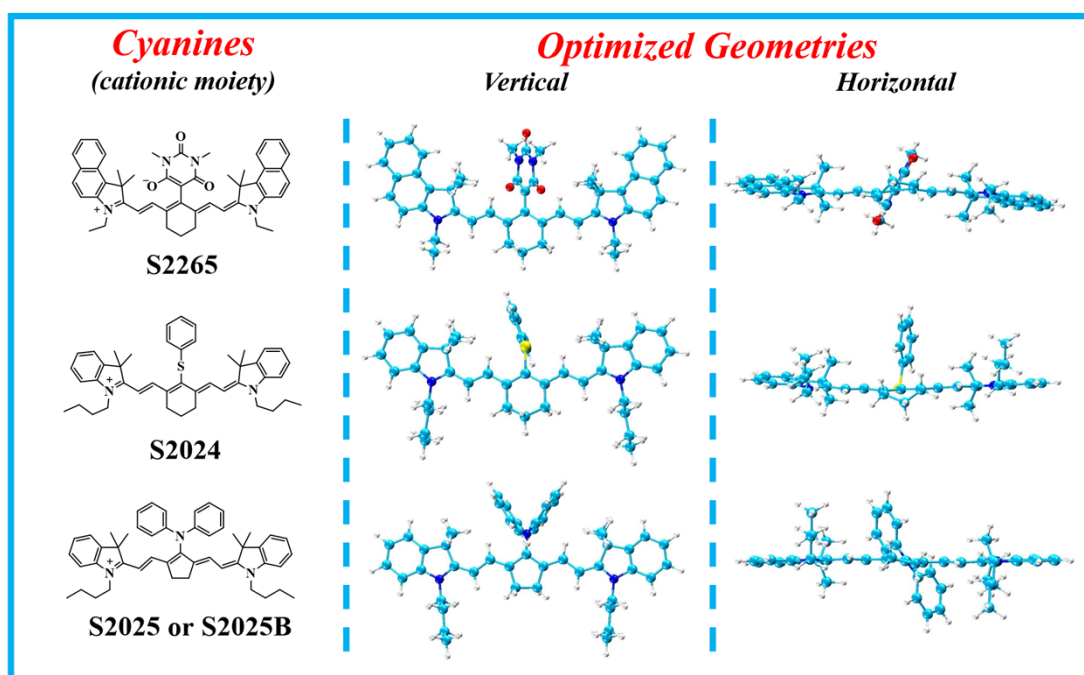

**Fig. S9** Optimized geometries of cyanines (cationic moiety) at B3LYP/6-31G\* level.

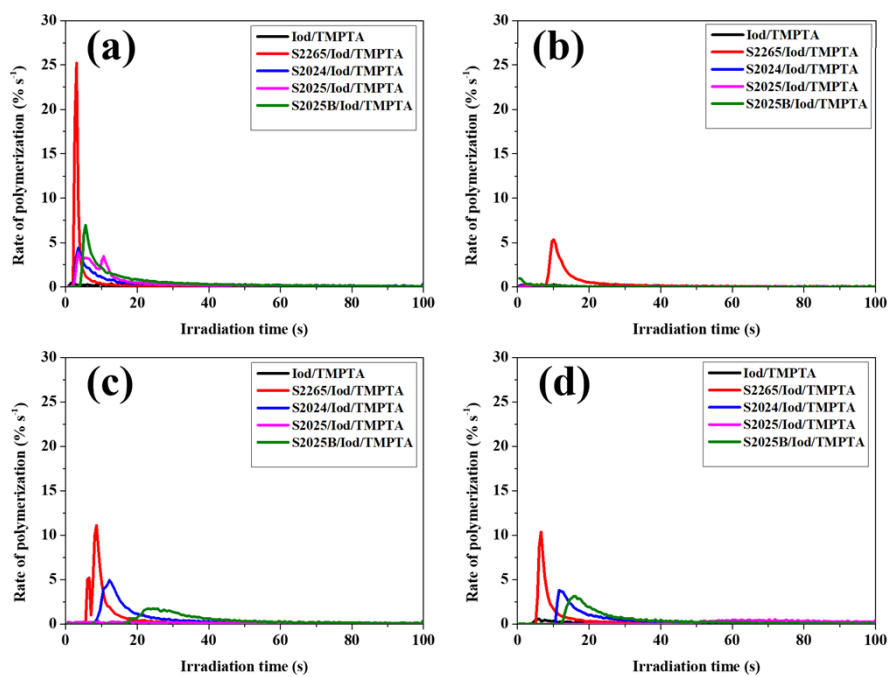

**Fig. S10** Photopolymerization rate of cyanine/Iod/TMPTA systems (0.002:0.01:1, mole ratio) upon irradiation at (a) 808 nm laser, (b) 630 nm LED, (c) 450 nm LED and (d) 400 nm UV-LED.

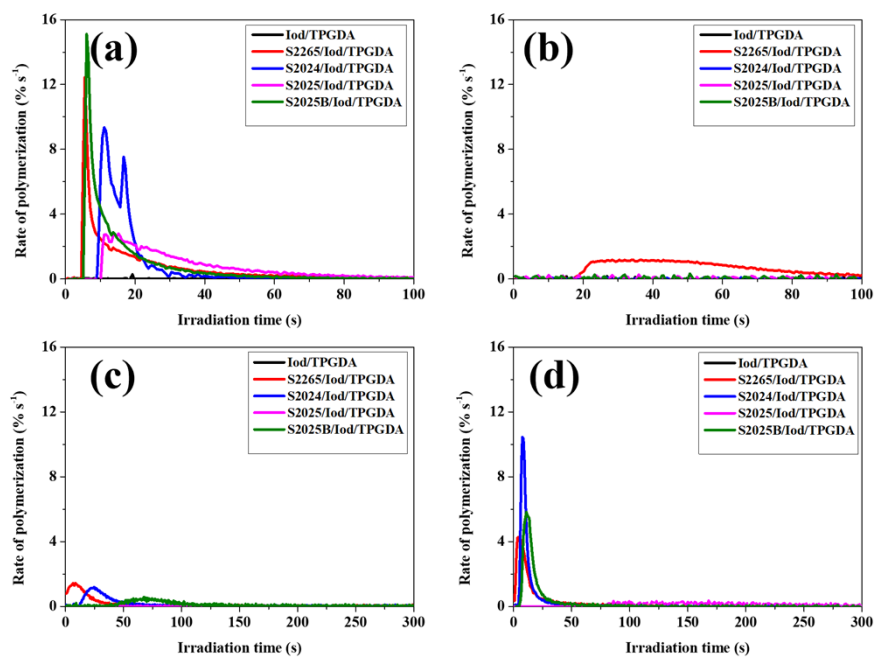

**Fig. S11** Photopolymerization rate of cyanine/Iod/TPGDA systems (0.002:0.01:1, mole ratio) upon irradiation at (a) 808 nm laser, (b) 630 nm LED, (c) 450 nm LED and (d) 400 nm UV-LED.

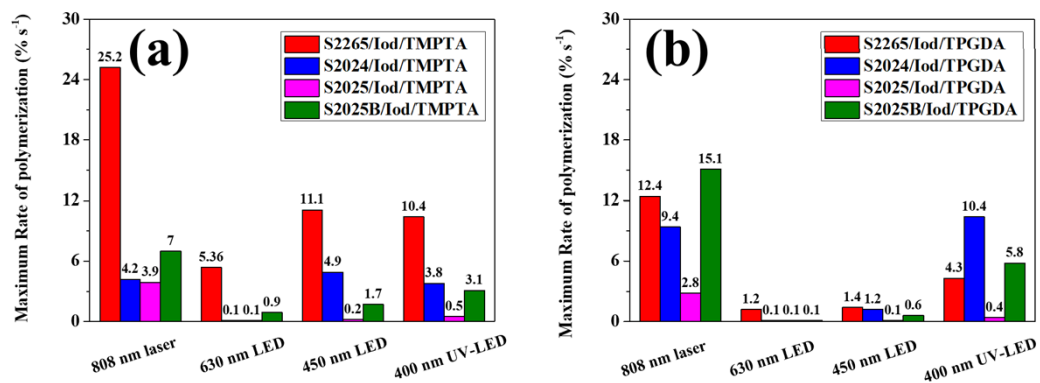

**Fig. S12** Maximum rates of polymerization for cyanine/Iod/monomer systems.

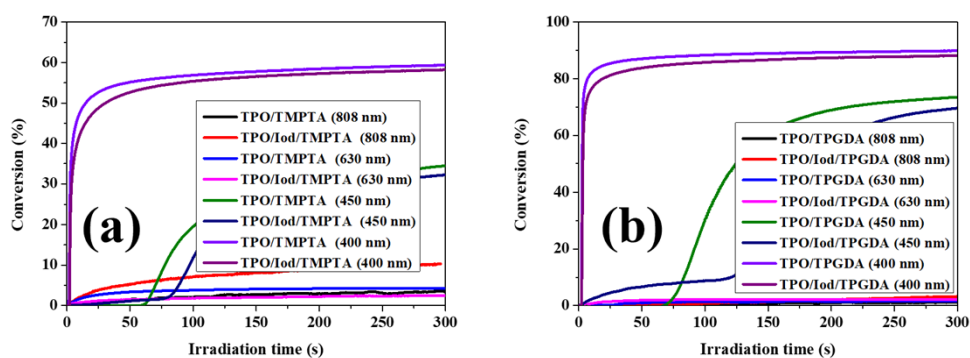

**Fig. S13** Photopolymerization kinetics of (a) TPO/TMPTA (0.01:1, mole ratio), TPO/Iod/TMPTA systems (0.01:0.01:1, mole ratio), (b) TPO/TPGDA (0.01:1, mole ratio) and TPO/Iod/TPGDA systems (0.01:0.01:1, mole ratio) upon irradiation at 808 nm laser, 630 nm LED, 450 nm LED and 400 nm UV-LED.



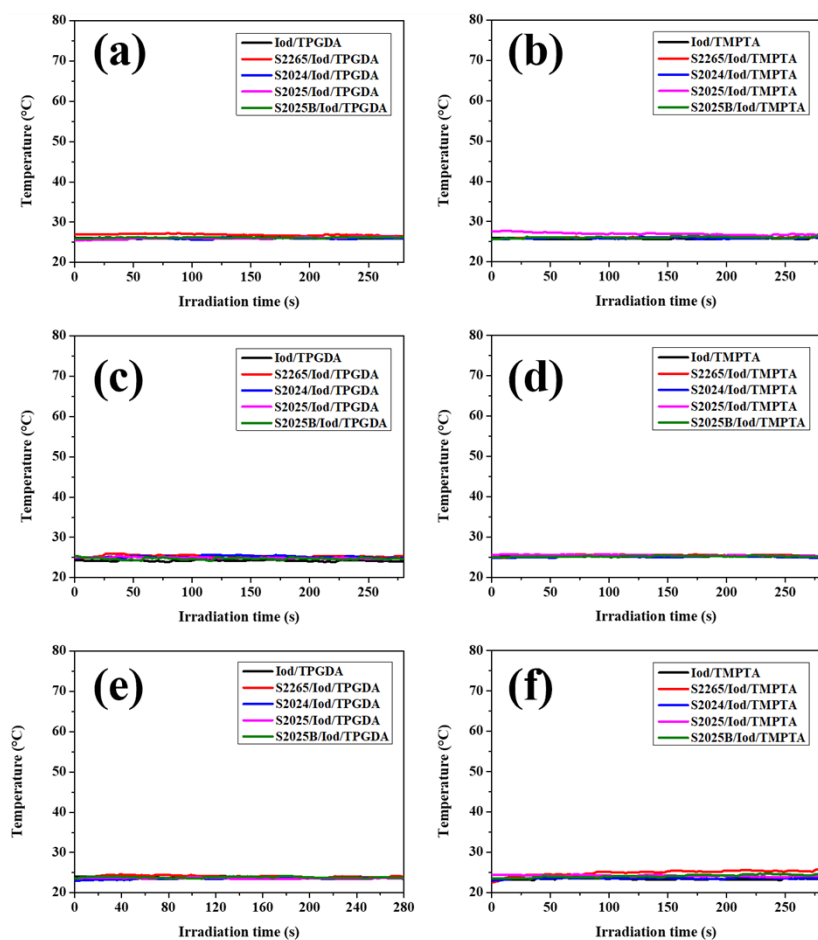

**Fig. S14** Curves of temperature maximum versus time recorded by thermal imaging camera in the presence of (a) cyanine/Iod/TPGDA systems under irradiation at 630 nm LED, (b) cyanine/Iod/TMPTA systems under irradiation at 630 nm LED, (c) cyanine/Iod/TPGDA systems under irradiation at 450 nm LED, (d) cyanine/Iod/TMPTA systems under irradiation at 450 nm LED, (e) cyanine/Iod/TPGDA systems under irradiation at 400 nm UV-LED and (f) cyanine/Iod/TMPTA systems under irradiation at 400 nm UV-LED.

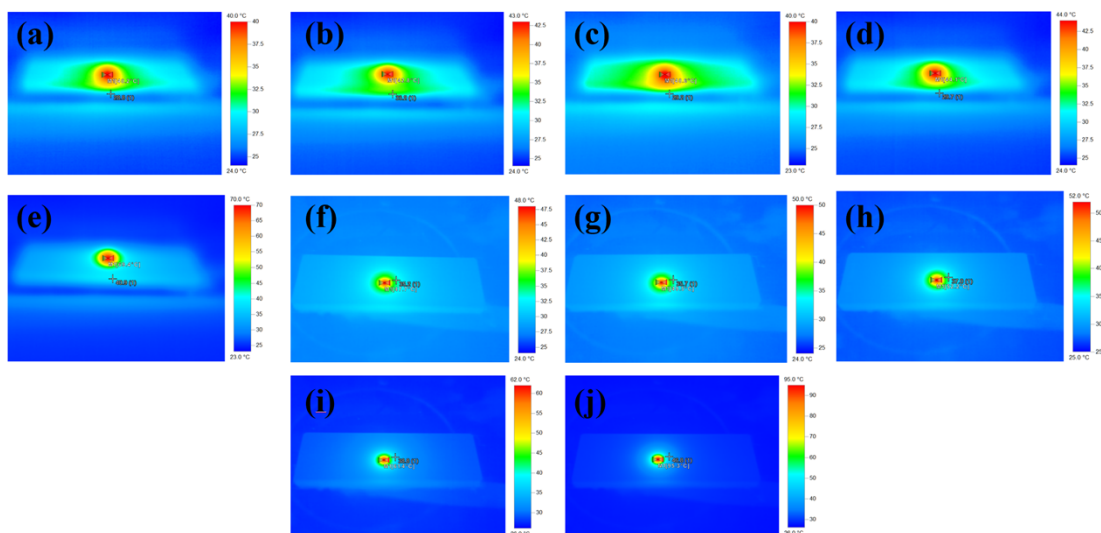

**Fig. S15** thermal imaging pictures after irradiation at 808 nm laser, (a) Iod/TPGDA, (b) S2265/Iod/TPGDA, (c) S2024/Iod/TPGDA, (d) S2025/Iod/TPGDA, (e) S2025B/Iod/TPGDA, (f) /Iod/TMPTA, (g) S2265/Iod/TMPTA, (h) S2024/Iod/TMPTA, (i) S2025/Iod/TMPTA and (j) S2025B/Iod/TMPTA.

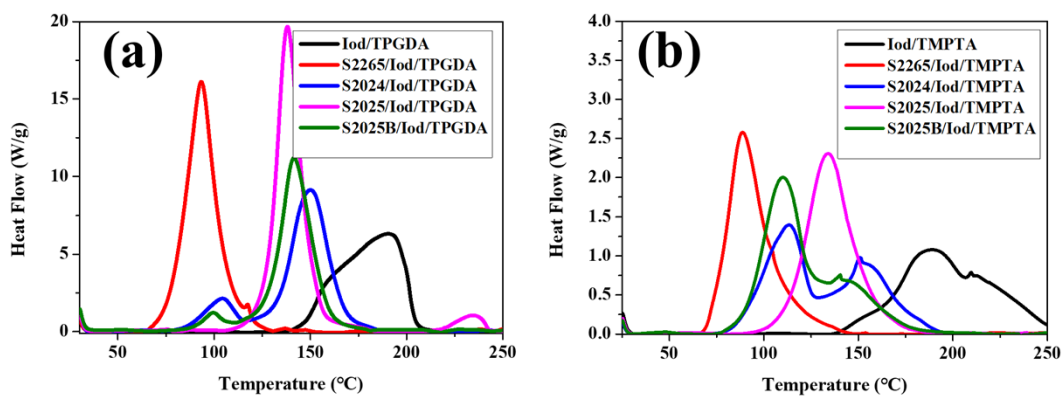

**Fig. S16** DSC curves of cyanine/Iod/TPGDA systems (0.002:0.01:1, mole ratio) and cyanine/Iod/TMPTA systems (0.002:0.01:1, mole ratio).

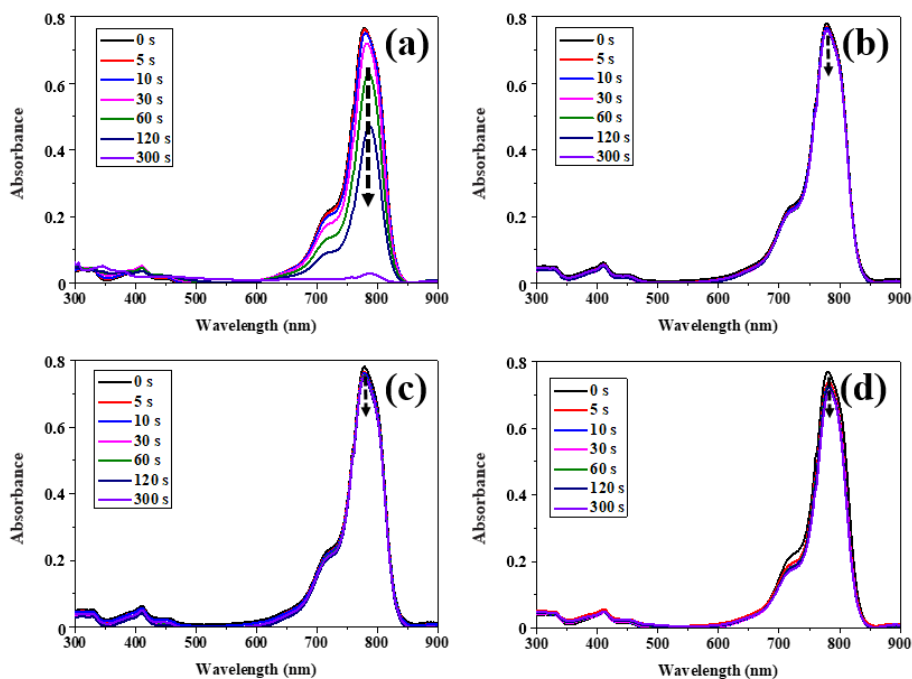

**Fig. S17** Photolysis curves of S2265 in anhydrous dichloromethane upon irradiation at (a) 808 nm laser, (b) 630 nm LED, (c) 450 nm LED and (d) 400 nm UV-LED (concentration =  $2.0 \times 10^{-6}$  mol  $L^{-1}$  for S2265).

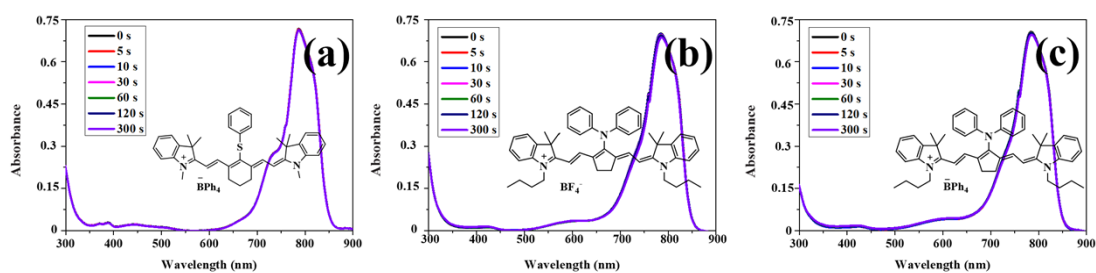

**Fig. S18** Photolysis curves of (a) S2024/Iod system, (b) S2025/Iod system and (c) S2025B/Iod system in anhydrous dichloromethane upon irradiation at 630 nm LED (concentration =  $2.0 \times 10^{-6}$  mol  $L^{-1}$  for cyanines and  $8 \times 10^{-6}$  mol  $L^{-1}$  for Iod).

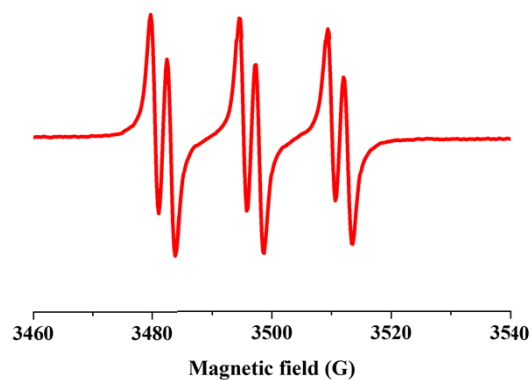

**Fig. S19** ESR spectra of Iod under exposure to high-pressure mercury lamp trapped by PBN.

**Table S1** Molar extinction coefficients ( $\epsilon$ ) of cyanines in anhydrous dichloromethane at 808 nm, 630 nm, 450 nm, 400 nm and  $\lambda_{\max}$

| cyanines | $\lambda_{\max}$ (nm) | $\epsilon$ ( $M^{-1} \text{ cm}^{-1}$ ) |                  |                  |                  |                  |
|----------|-----------------------|-----------------------------------------|------------------|------------------|------------------|------------------|
|          |                       | $\epsilon_{\max}$                       | $\epsilon_{808}$ | $\epsilon_{630}$ | $\epsilon_{450}$ | $\epsilon_{400}$ |
| S2265    | 788                   | 355,900                                 | 171,200          | 6,450            | 5,240            | 11,500           |
| S2024    | 803                   | 334,300                                 | 316,900          | 2,640            | 4,350            | 2,980            |
| S2025    | 802                   | 255,000                                 | 243,300          | 7,160            | 920              | 1,860            |
| S2025B   | 802                   | 262,300                                 | 250,500          | 7,290            | 860              | 1,880            |

**Table S2** Final double bond conversion of cyanine/Iod/TMPTA systems under irradiation at 808 nm laser, 630 nm LED, 450 nm LED and 400 nm UV-LED

|            | Final conversion (%) |        |        |        |
|------------|----------------------|--------|--------|--------|
|            | 808 nm               | 630 nm | 450 nm | 400 nm |
| Iod        | 11.2                 | 2.0    | 5.8    | 8.4    |
| S2265/Iod  | 43.7                 | 40.0   | 51.7   | 42.3   |
| S2024/Iod  | 47.2                 | 13.4   | 52.8   | 42.9   |
| S2025/Iod  | 49.0                 | 11.2   | 29.5   | 34.5   |
| S2025B/Iod | 63.3                 | 30.8   | 47.0   | 49.9   |

**Table S3** Final double bond conversion of cyanine/Iod/TPGDA systems under irradiation at 808 nm laser, 630 nm LED, 450 nm LED and 400 nm UV-LED

|            | Final conversion (%) |        |        |        |
|------------|----------------------|--------|--------|--------|
|            | 808 nm               | 630 nm | 450 nm | 400 nm |
| Iod        | 2.4                  | 2.4    | 1.6    | 2.9    |
| S2265/Iod  | 73.8                 | 77.5   | 67.8   | 73.1   |
| S2024/Iod  | 79.3                 | 0.3    | 71.6   | 84.7   |
| S2025/Iod  | 77.2                 | 0.6    | 4.21   | 49.0   |
| S2025B/Iod | 89.5                 | 3.3    | 56.3   | 80.3   |

**Table S4** Parameters Characterizing the Reactivity of cyanines with Iod

|        | $E_{\text{ox}}$ (V)  | $E_{\text{red}}$ (V)  | $\Delta G$ (eV) |
|--------|----------------------|-----------------------|-----------------|
| S2265  | 0.480 <sup>[a]</sup> | -0.970 <sup>[a]</sup> | -0.454          |
| S2024  | 0.588                | -0.620                | -0.316          |
| S2025  | 0.515                | -0.686                | -0.391          |
| S2025B | 0.521                | -0.681                | -0.385          |
| Iod    |                      | -0.640 <sup>[a]</sup> |                 |

[a] Datas were quoted from reference [1].

## REFERENCES

1. Strehmel, B.; Schmitz, C.; Kutahya, C.; Pang, Y.; Drewitz, A.; Mustroph, H., Photophysics and photochemistry of NIR absorbers derived from cyanines: key to new technologies based on chemistry 4.0. *Beilstein J Org Chem* **2020**, *16*, 415-444.
